# Supplementary material for: PtPd NPs-functionalized metal–organic framework-derived α-Fe2O3 porous spindles for efficient low-temperature detection of triethylamine
Source: Royal Society of Chemistry journal article supplement (doi:10.1039/d3dt02110f), 2023-01-01
Supplement: d3dt02110f1.pdf [file d3dt02110f1.pdf]

## Supplementary material

### **PtPd NPs functionalized metal-organic framework-derived $\alpha$ -Fe<sub>2</sub>O<sub>3</sub> porous spindles for low-temperature efficient detection of triethylamine**

Xianwen Yan<sup>a</sup>, Xueli Yang<sup>a\*</sup>, Zhen Sun<sup>a</sup>, Caixuan Sun<sup>a</sup>, Zheng Hu<sup>a</sup>, Yalin Zhang<sup>a</sup>,  
Guofeng Pan<sup>a</sup>, Lanlan Guo<sup>b</sup>, Yuhang Qi<sup>a\*</sup>, Yehong Cheng<sup>c\*</sup>

<sup>a</sup> School of Electronics and Information Engineering, Hebei University of Technology,

Hebei Collaborative Innovation Center of Microelectronic Materials and Technology  
on Ultra Precision Processing (CIC), Hebei Engineering Research Center of  
Microelectronic Materials and Devices(ERC), Tianjin, 300130, China

<sup>b</sup> School of Physics and Electronic Information Engineering, Henan Polytechnic  
University, Jiaozuo, 454003, China

<sup>c</sup> School of Mechanical Engineering, Hebei University of Technology, Tianjin, 300401,  
China

\*Corresponding authors:

E-mail addresses: xlyang@hebut.edu.cn, yuhangqi@hebut.edu.cn,

chengyehong@hebut.edu.cn

**Table. S1.** Content of samples S1-S6

| Sample | $\alpha$ -Fe <sub>2</sub> O <sub>3</sub> (wt%) | Pt (wt%) | Pd (wt%) |
|--------|------------------------------------------------|----------|----------|
| S1     | 100                                            | 0        | 0        |
| S2     | 100                                            | 1.35     | 0.15     |
| S3     | 100                                            | 1.425    | 0.075    |
| S4     | 100                                            | 1.275    | 0.225    |
| S5     | 100                                            | 1.5      | 0        |
| S6     | 100                                            | 0        | 1.5      |

**Table. S2.** The O1 s XPS spectrum fitting results of the four samples.

| Oxygen<br>Species | Peak (eV)   | S1     | S2     | S5     | S6     |
|-------------------|-------------|--------|--------|--------|--------|
| O <sub>L</sub>    | 528.4~528.7 | 29.58% | 22.00% | 25.00% | 27.31% |
| O <sub>V</sub>    | 529.8~530.0 | 32.12% | 49.95% | 48.50% | 45.74% |
| O <sub>C</sub>    | 531.6~532.0 | 38.30% | 28.05% | 26.50% | 26.95% |

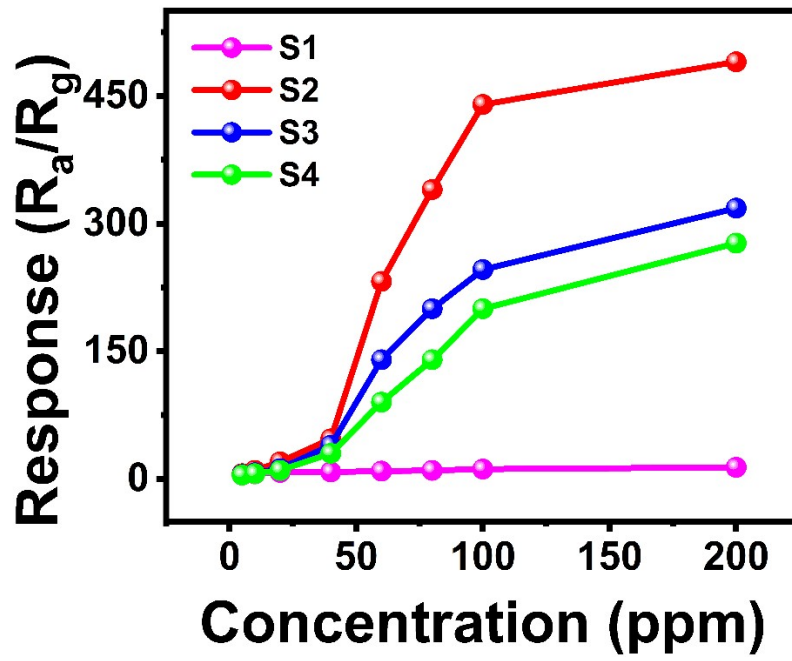

**Fig. S1.** The responses of the four materials at different concentrations of triethylamine.

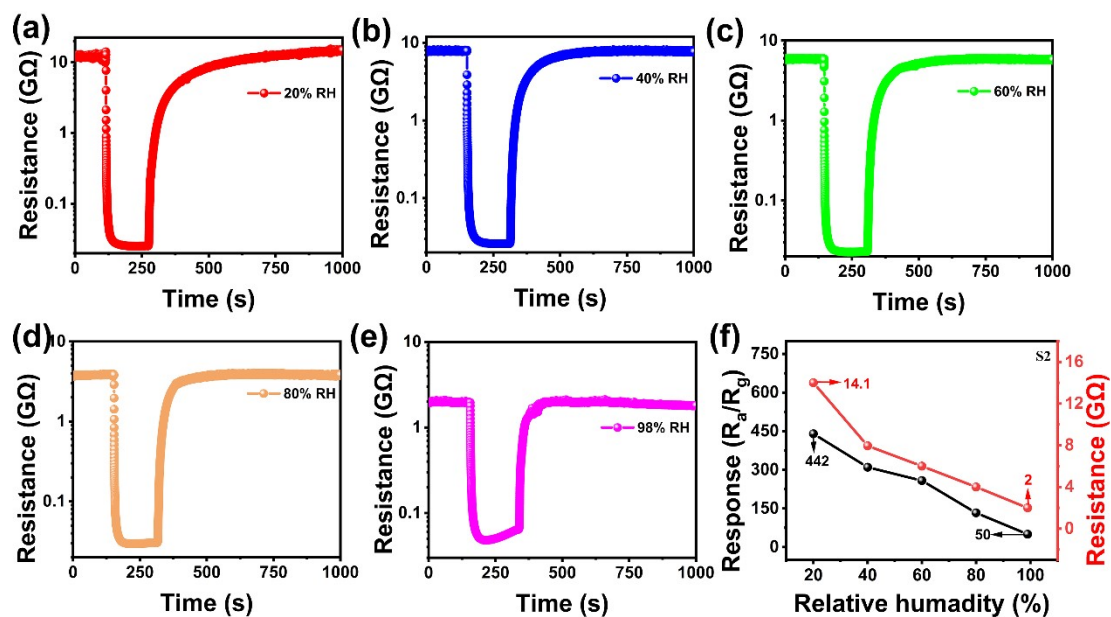

**Fig. S2.** (a-e) Dynamic response curves of the S2 to 100 ppm TEA for varying humidity conditions (20%, 40%, 60%, 80%, and 98% RH, 30°C) at 150°C, (f) Change in resistance and response with increasing humidity.

To further evaluate the sensing performance of the S2 sensor to humidity, the resistance curves of the S2 sensor to 100 ppm TEA were measured at 20% RH, 40% RH, 60% RH, 80% RH, and 98% RH (Fig. S2(a-e)). Fig. S2(f) shows the response and resistance of the S2 sensor with varied humidity, where the resistance decreases from 14.1 GΩ to 2 GΩ and the response decreases from 442 to 50, and the response were 442, 310, 258, 133, 50 under each relative humidity. The decrease in resistance and response is mainly due to the reaction of water vapor with the adsorbed oxygen molecules, which reduces the band bending and hinders the reaction of TEA with the sensing material[1]. Gas sensors are used in situations where the humidity does not exceed 60% RH in general. The response of the sensor in this work was achieved 258 under 60% RH. However, in order to improve the moisture resistance of the sensor, some moisture resistance techniques still need to be applied in subsequent research.

[1] P.F. Cheng, F. Dang, Y.L. Wang, J.N. Gao, L.P. Xu, C. Wang, et al., Gas sensor towards n-butanol at low temperature detection: Hierarchical flower-like Ni-doped  $\text{Co}_3\text{O}_4$  based on solvent-dependent synthesis, *Sens Actuator B-Chem* 328(2021) 12.
